# Supplementary material for: Tofogliflozin Delays Portal Hypertension and Hepatic Fibrosis by Inhibiting Sinusoidal Capillarization in Cirrhotic Rats
Source: MDPI journal article supplement (doi:10.3390/cells13060538), 2024-03-19
Supplement: s1 [file s1]

## Supplementary figures

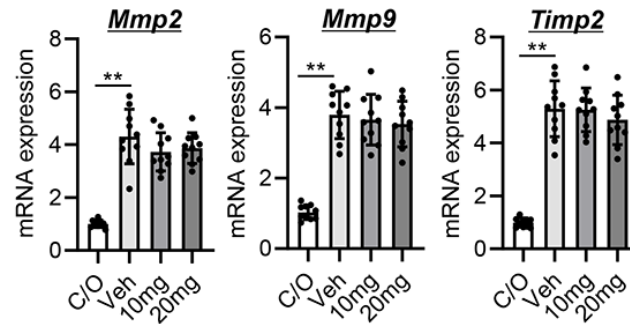

**Figure S1. Effect of tofogliflozin on MMPs and Timp2 expression.** Relative mRNA levels of *Mmp2*, *Mmp9*, and *Timp2* in the liver of experimental rats.

*Gapdh* was used as an internal control for qRT-PCR. Quantitative values are indicated as fold changes to the values of C/O group. Data are the mean  $\pm$  SD (n = 10). \*\*P < 0.01, significant difference between groups by Student's t-test.

N.S, not significant; C/O, corn oil-injected negative control group; Veh, CCl<sub>4</sub>+vehicle-treated group; 10mg, CCl<sub>4</sub>+tofogliflozin (10mg/kg/day)-treated group; 20mg, CCl<sub>4</sub>+tofogliflozin (20mg/kg/day)-treated group.

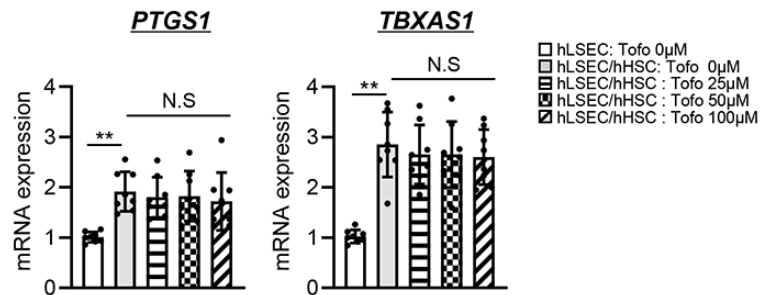

**Figure S2. Effect of tofogliflozin on COX-1 and TXA2 expression in LSEC co-cultured with activated HSC.** Effect of tofogliflozin (Tofo) on mRNA levels of *PTGS1* and *TBXAS1*, encoding cyclooxygenase (COX-1) and thromboxane A2 (TXA2) respectively, in activated human HSC (Ac-hHSC)-stimulated human liver sinusoidal endothelial cell (hLSEC). *GAPDH* was used as internal control for qRT-PCR. Quantitative values are indicated as fold changes to the values of mono-cultured LSEC without tofogliflozin treatment (hLSEC: Tofo 0μM) group. Data are the mean  $\pm$  SD (n = 8). \*\*P < 0.01, significant difference between groups by Student's t-test.

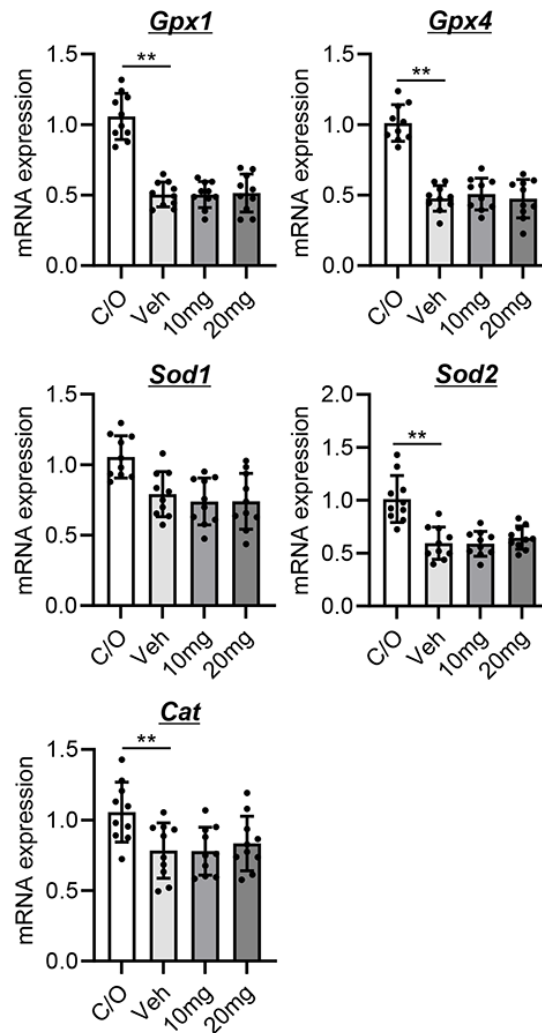

**Figure S3. Effect of tofogliflozin on the anti-oxidant gene expression in the liver of CCl<sub>4</sub>-treated rats.** Relative mRNA levels of *Gpx1*, *Gpx4*, *Sod1*, *Sod2* and *Cat* in the liver of experimental rats. *Gapdh* was used as an internal control for qRT-PCR. Quantitative values are indicated as fold changes to the values of C/O group. Data are the mean  $\pm$  SD (n = 10). \*\*P < 0.01, significant difference between groups by Student's t-test. N.S, not significant; C/O, corn oil-injected negative control group; Veh, CCl<sub>4</sub>+vehicle-treated group; 10mg, CCl<sub>4</sub>+tofogliflozin (10mg/kg/day)-treated group; 20mg, CCl<sub>4</sub>+tofogliflozin (20mg/kg/day)-treated group.

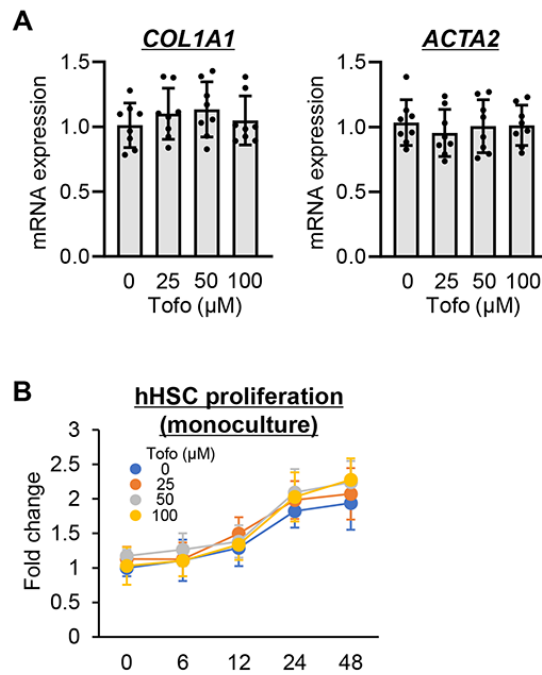

**Figure S4. Direct effect of tofogliflozin on the phenotypes of activated HSC.** (A) Effect of Tofo on the profibrogenic markers expression in activated human hepatic stellate cell (Ac-hHSC) under mono-culture condition. *GAPDH* was used as internal control for qRT-PCR. (B) Effect of Tofo on cell proliferation in in Ac-hHSC under mono-culture condition. Quantitative values are indicated as fold changes to the values of Tofo (0  $\mu$ M) treatment group. Data are the mean  $\pm$  SD (n = 8). Significant difference between groups was determined by Student's t-test.

**Supplementary Table S1. List of primers used in q-PCR.**

| Gene   | Sense (5'-3')          | Antisense (5'-3')     |
|--------|------------------------|-----------------------|
| Rat    |                        |                       |
| Cth    | CCATCCACGTGGGACAAGAG   | GGATTTCAGAGCGGCTGTA   |
| Ddah1  | CGTGGCCGATTCTTTGCATT   | CATGCCCTTTGCTGGGGATA  |
| Gch1   | TCACCTGGTCCCATTGTGG    | TGGCAAGTTTGCTGAGACCA  |
| Vegfa  | TATATCTTCAAGCCGTCCTGTG | TCTCCTATGTGCTGGCTTTG  |
| Vwf    | CCTTGTGAAGTGGCTCGTCT   | GCAAGTTGCAGTTGACCAGG  |
| Ang1   | CAGCTTCTCCAACAGACAAATG | ACGAGTAACCAAGCCTTGAAG |
| Ang2   | ATCTTGTCTTGGCCTCAGCC   | AATGTGTAGCTGCAGGGTCC  |
| Adgre1 | AATCGCTGCTGGCTGAATACGG | CCAGGCAAGGAGGGCAGAGTT |
| Tnfa   | GGCTTTCGGAACCTCACTGGA  | CCCGTAGGGCGATTACAGTC  |
| Il6    | CACTTCACAAGTCGGAGGCT   | AGCACACTAGGTTTGCCGAG  |
| Il1b   | TTGAGTCTGCACAGTTCCCC   | GTCCTGGGGAAGGCATTAGG  |
| Col1a1 | GGAGAGAGCATGACCGATGG   | GGTGGGAGGGAACCAGATTG  |
| Acta2  | GGCATCCACGAAACCACCTA   | AGGGCTAGAAGGGTAGCACA  |
| Pdgfrb | CAGCAAAATAACAGGACAGCG  | GCAATAGCACGAACAGCAAC  |
| Tgfr1  | ACTCCCAACTACAGAAAAGCA  | CAACTTCTTCTCCCCGCCAT  |
| Nrp1   | CACCCGGTCTTCCATAAGGG   | AAATCCTCAGCCGGTCTTGG  |
| Lgals1 | TCGCTTCAATCATGGCCTGT   | GAAGCGGGGGTTGAAGTGTA  |
| Mmp13  | TCCATCCCGAGACCTCATGT   | CTCAAAGTGAACCGCAGCAC  |
| Timp1  | TAAAGCCTGTAGCTGTGCCC   | AGCGTCGAATCCTTTGAGCA  |
| Mmp2   | GGTGGCAATGGAGATGGACA   | CCCGGTCATAATCCTCGGTG  |
| Mmp9   | GATCCCCAGAGCGTTACTCG   | GTTGTGGAACTCACACGCC   |
| Timp2  | CCTCTTCGCCCCTTGACAAA   | CCTCTTGATGGGGTTGCCAT  |
| Gpx1   | CAGTCCACCGTGTATGCCTT   | GTAAAGAGCGGGTGAGCCTT  |
| Gpx4   | ATCCCGAGCCTTTCAACCC    | TATCGGGCATGCAGATCGAC  |
| Sod1   | TAAGTGAAGGCGAGCATGGG   | TCCAATCACACCACAAGCC   |
| Sod2   | ACCGAGGAGAAGTACCACGA   | CCTGAACCTTGGAATCCAC   |
| Cat    | TTTTACCGACGAGATGGCA    | AAGGTGTGTGAGCCATAGCC  |
| Gapdh  | AGCTTGTCATCAACGGGAAG   | TTTGATGTTAGTGGGGTCTCG |
| Human  |                        |                       |
| SGLT2  | GGAGATGAATGAGCCCCAGG   | GAGGCTGTGGCTTATGGTGT  |
| CD34   | CTCCAGCTGTGCGGAGTTTA   | TAATAAGGGTCTTCGCCCAGC |

|        |                       |                       |
|--------|-----------------------|-----------------------|
| VCAM1  | CGAATGAGGGGACCACATCTA | CGCTCAGAGGGGCTGTCTATC |
| CD32b  | AGCGGATTTTCAGCCAATCCC | TGGATGTGGAACGGAAGAGC  |
| ET1    | GCTGCCTTTTCTCCCCGTT   | GGATGCTCCTGCTCTGATCC  |
| GPX1   | TATCGAGAATGTGGCGTCCC  | TCTTGGCGTTCTCCTGATGC  |
| GPX4   | TCACCAAGTTTGGACACCGT  | ATAGTGGGGCAGGTCCTTCT  |
| SOD1   | AAAGATGGTGTGGCCGATGT  | CAAGCCAAACGACTTCCAGC  |
| SOD2   | GCACTAGCAGCATGTTGAGC  | GCCTGTTGTTCCCTGCAGTG  |
| CAT    | AGTGATCGGGGGATTCCAGA  | CCACCCTGATTGTCCTGCAT  |
| COL1A1 | TGACGAGACCAAGAACTGCC  | CCATTCTTTCCAGGGGGACC  |
| ACTA2  | CACGATGTACCCTGGGATCG  | GCCGATCCACACCGAGTATT  |
| TGFB1  | ACCTGCCACAGATCCCCTAT  | GAGCAACACGGGTTCAAGTA  |
| PTGS1  | CGGAGTCTCTTGCTCTGGTT  | GGGGGTAGTGCATCAACACA  |
| TBXAS1 | TTTGCTTGTTGCCTGTTCC   | AAAAACAGAACGCTGTCGGC  |
| GAPDH  | AATGGGCAGCCGTTAGGAAA  | GCGCCCAATACGACCAAATC  |
